# Supplementary material for: Genome-wide HP1 binding in Drosophila: Developmental plasticity and genomic targeting signals
Source: HighWire-hosted journal article supplement (doi:10.1101/gr.3198905), 2005-08-18
Supplement: Supp_Figure_2.pdf [file Supp_Figure_2.pdf]

A

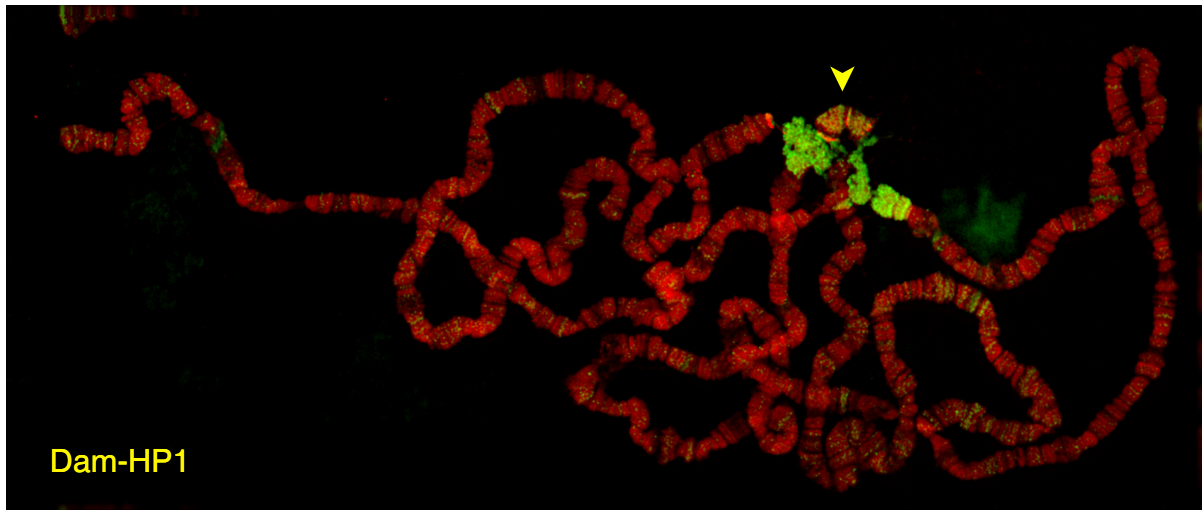

B

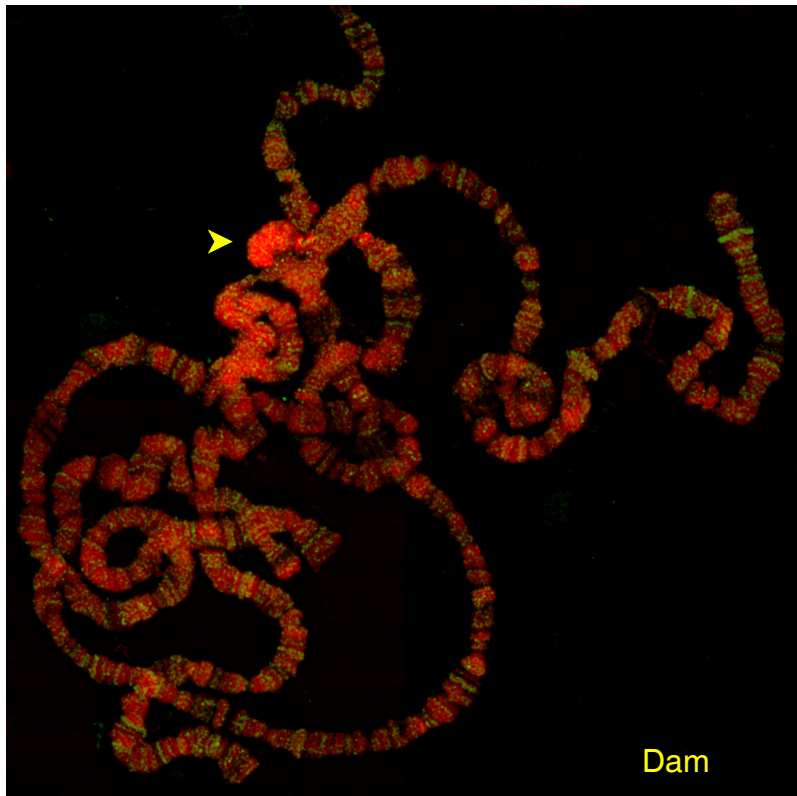

**Figure S2: Immunofluorescence of adenine methylation on polytene chromosomes.** Third instar polytene chromosomes we stained with an antibody against N6-methyladenine. A) Polytene chromosomes from Dam-HP1 expressing flies. B) Polytene chromosomes from Dam expressing flies. Arrowhead indicate the heterochromatic fourth chromosome.
