# Supplementary material for: Genome-wide HP1 binding in Drosophila: Developmental plasticity and genomic targeting signals
Source: HighWire-hosted journal article supplement (doi:10.1101/gr.3198905), 2005-08-18
Supplement: Supp_Figure_3.pdf [file Supp_Figure_3.pdf]

A

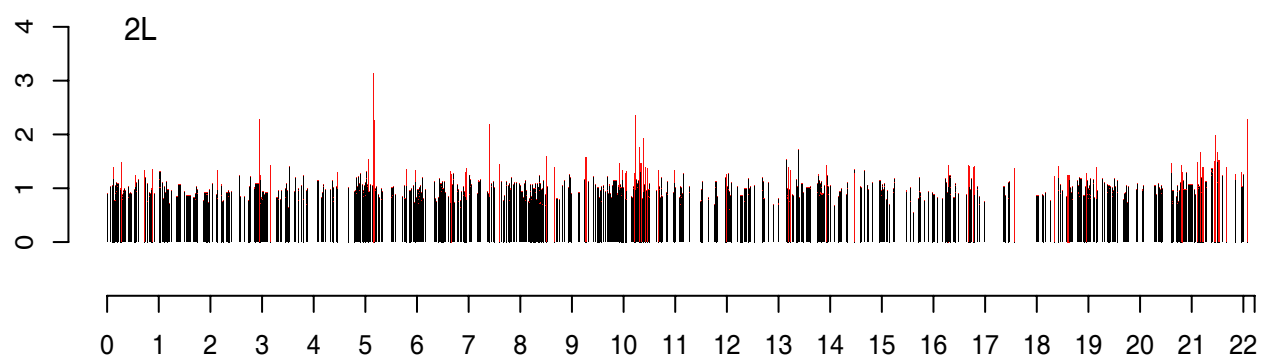

B

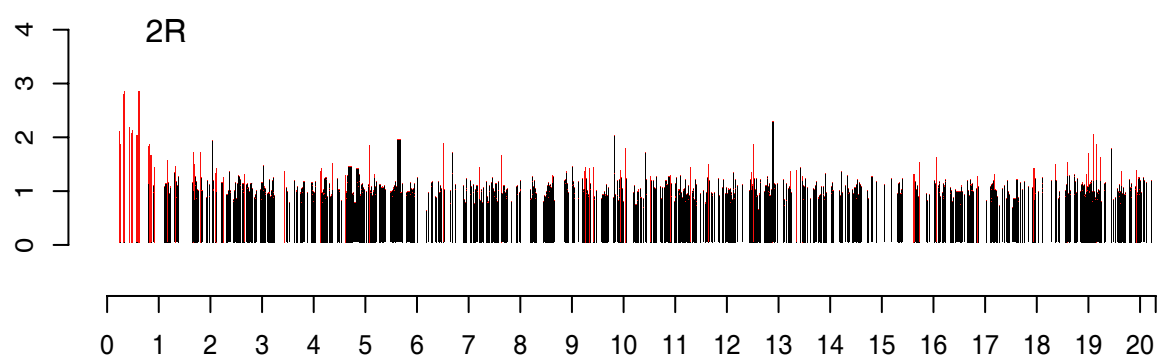

**Figure S3: Chromosomal binding maps for the second chromosome.** A) HP1 binding along the left arm of chromosome 2. Bars represent individual cDNAs on the array. Height of the bars represents the binding ratio. Regions significantly bound by HP1 are indicated in red. The centromere is located at the right end of the plot. B) HP1 binding map of the right arm of chromosome 2. The centromere is located left end of the plot.
