# Supplementary material for: Genome-wide HP1 binding in Drosophila: Developmental plasticity and genomic targeting signals
Source: HighWire-hosted journal article supplement (doi:10.1101/gr.3198905), 2005-08-18
Supplement: Supp_Figure_4.pdf [file Supp_Figure_4.pdf]

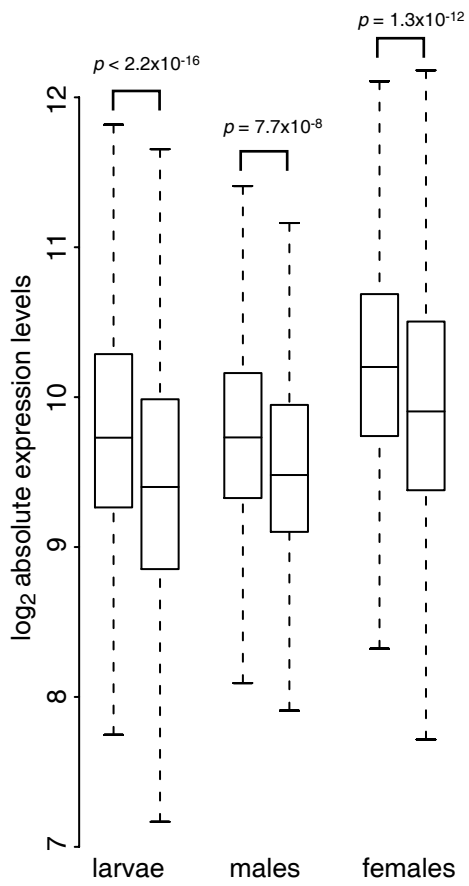

**Figure S4: HP1 target genes show lower absolute expression levels in their respective environment.**

Boxplots representing expression levels of genes bound by HP1 (right) and genes not bound by HP1 (left) in larvae, adult males and adult females. Expression data were taken from Stolc et al. (2004).
